# Supplementary material for: Fatal outcome of human influenza A (H5N1) is associated with high viral load and hypercytokinemia
Source: Springer Nature journal article supplement (doi:10.1038/nm1477), 2006-09-10

**Supplementary Figure 1.** Pharyngeal virus load in relation to onset of illness during H5N1 influenza and human influenza. Viral RNA loads were measured in throat swabs obtained at admission from 18 H5N1 patients (circle), and eight patients with H3N2 or H1N1 influenza (triangle).

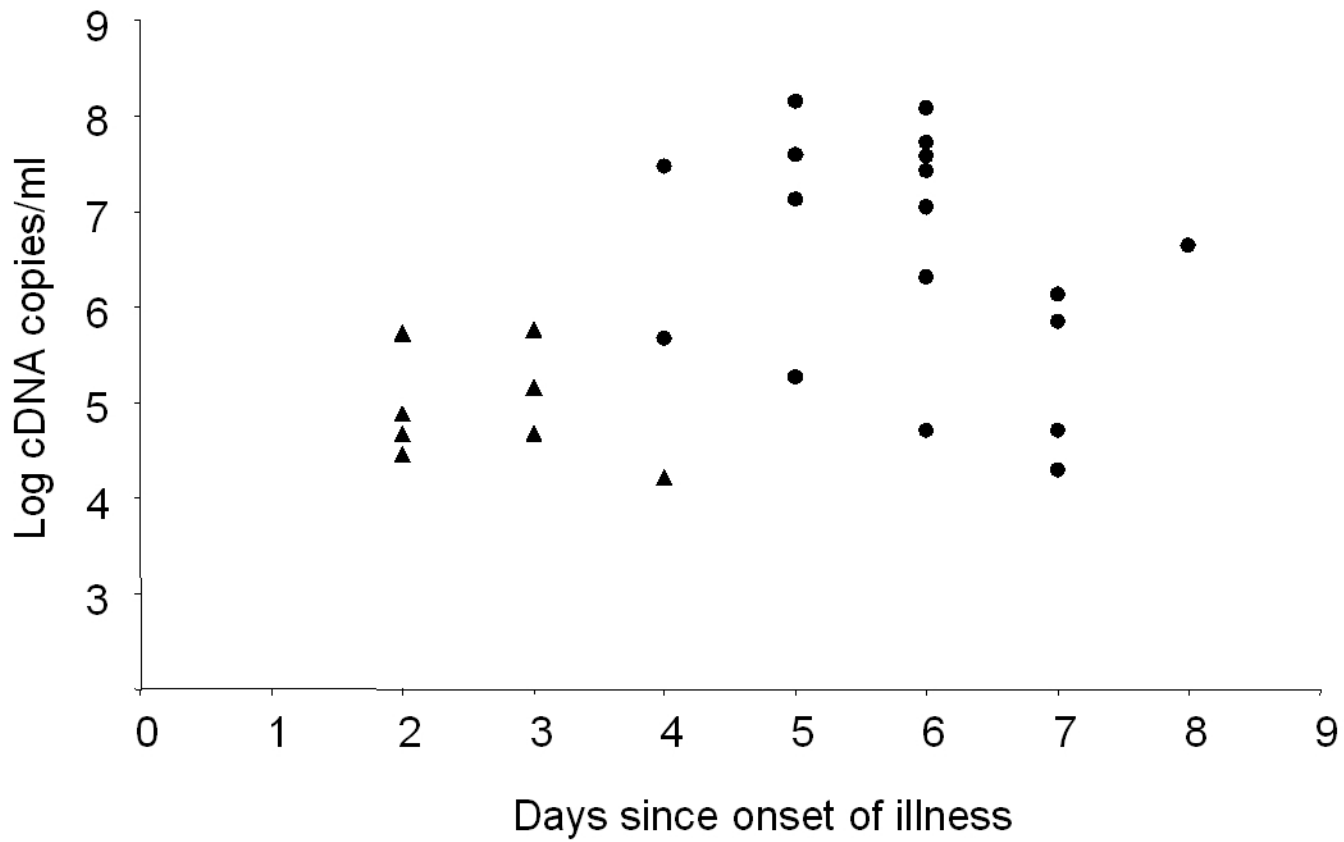

Supplement: 41591_2006_BFnm1477_MOESM1_ESM.pdf [file 41591_2006_BFnm1477_MOESM1_ESM.pdf]
