# Supplementary material for: Fatal outcome of human influenza A (H5N1) is associated with high viral load and hypercytokinemia
Source: Springer Nature journal article supplement (doi:10.1038/nm1477), 2006-09-10

**Supplementary Figure 2.** Nasal, pharyngeal and tracheal virus load during the course of illness in two H5N1 patients. Viral RNA loads were measured in nasal swabs (triangle), throat swabs (circle) and tracheal aspirates (square) from two H5N1 patients and revealed higher viral RNA loads and more prolonged detection of viral RNA in tracheal specimens compared to nasal and pharyngeal specimens. Both patients received a five-day course of oseltamivir upon admission. The dashed horizontal line signifies the lower limit of detection of viral RNA.

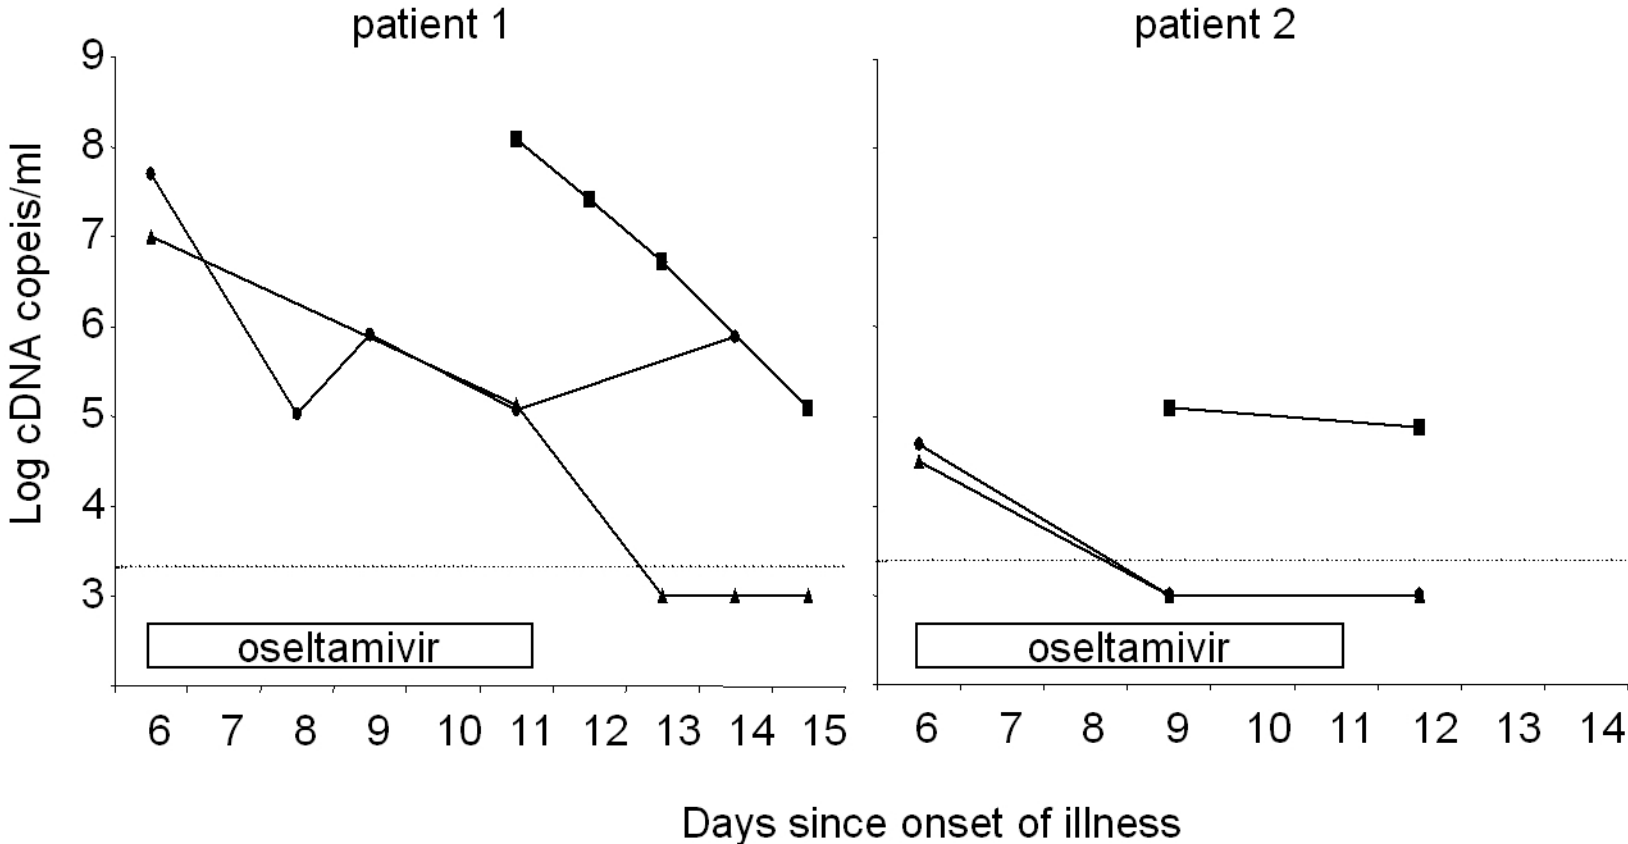

Supplement: 41591_2006_BFnm1477_MOESM2_ESM.pdf [file 41591_2006_BFnm1477_MOESM2_ESM.pdf]
