# Supplementary material for: Fatal outcome of human influenza A (H5N1) is associated with high viral load and hypercytokinemia
Source: Springer Nature journal article supplement (doi:10.1038/nm1477), 2006-09-10
Supplement: 41591_2006_BFnm1477_MOESM3_ESM.pdf [file 41591_2006_BFnm1477_MOESM3_ESM.pdf]

**Supplementary Table 1.**

**Peripheral blood lymphocyte counts and CD4<sup>+</sup>/CD8<sup>+</sup> ratios**

Total and CD3<sup>+</sup> lymphocyte counts (in cells per mm<sup>3</sup>) and ratios of CD4<sup>+</sup> to CD8<sup>+</sup> lymphocytes in the peripheral blood of patients with H5N1 influenza and patients with human subtypes of influenza. Data are presented as medians (range). <sup>a</sup> Measured in 14 H5N1 patients (nine fatal, five surviving) and six H3/H1 patients. <sup>b</sup> Measured in six H5N1 patients (three fatal, three surviving) and four H3/H1 patients. <sup>c</sup> Measured in six H5N1 patients (three fatal, three surviving).

|                                                       | H5N1              | H3/H1              | <i>P</i> | H5N1             |                   |          |
|-------------------------------------------------------|-------------------|--------------------|----------|------------------|-------------------|----------|
|                                                       |                   |                    |          | fatal            | not fatal         | <i>P</i> |
| lymphocyte count <sup>a</sup>                         | 528<br>(129-1020) | 1736<br>(909-2917) | 0.001    | 490<br>(129-800) | 706<br>(427-1020) | 0.072    |
| CD3 <sup>+</sup><br>lymphocytes <sup>b</sup>          | 518<br>(217-653)  | 2110<br>(714-2545) | 0.011    | 327<br>(217-557) | 621<br>(560-653)  | 0.050    |
| CD4 <sup>+</sup> /CD8 <sup>+</sup> ratio <sup>c</sup> | 0.8<br>(0.6-1.1)  | n/a                |          | 0.6<br>(0.6-0.8) | 1.1<br>(1.1-1.1)  | 0.034    |
