# Supplementary material for: Fatal outcome of human influenza A (H5N1) is associated with high viral load and hypercytokinemia
Source: Springer Nature journal article supplement (doi:10.1038/nm1477), 2006-09-10
Supplement: 41591_2006_BFnm1477_MOESM4_ESM.pdf [file 41591_2006_BFnm1477_MOESM4_ESM.pdf]

**Supplementary Table 2. GenBank accession numbers of H5N1 viral sequences and clinical outcome of patients**

| Name                        | outcome | Accession numbers of viral gene sequences |          |          |          |          |          |          |          |
|-----------------------------|---------|-------------------------------------------|----------|----------|----------|----------|----------|----------|----------|
|                             |         | HA                                        | NA       | MP       | NP       | NS       | PA       | PB1      | PB2      |
| A/ Vietnam/CL01/2004(H5N1)  | surv.   | DQ497719                                  | DQ493068 | DQ492980 | DQ493156 | DQ493244 | DQ493332 | DQ493418 | DQ492894 |
| A /Vietnam/CL02/2004(H5N1)  | fatal   | DQ497720                                  | DQ493069 | DQ492981 | DQ493157 | DQ493245 | -        | DQ493419 | DQ492895 |
| A/Vietnam/CL17/2004(H5N1)   | fatal   | DQ497721                                  | DQ493070 | DQ492982 | DQ493158 | DQ493246 | DQ493333 | DQ493420 | -        |
| A/Vietnam/CL20/2004(H5N1)   | fatal   | DQ497722                                  | DQ493071 | DQ492983 | DQ493159 | DQ493247 | DQ493334 | DQ493421 | pending  |
| A/Vietnam/CL26/2004(H5N1)   | surv.   | DQ497723                                  | DQ250160 | DQ492984 | DQ493160 | DQ493248 | DQ493335 | DQ493422 | DQ492896 |
| A/Vietnam/CL36/2004(H5N1)   | surv.   | DQ497724                                  | DQ493073 | DQ492985 | DQ493161 | DQ493249 | DQ493336 | DQ493423 | DQ492897 |
| A/Vietnam/PVE16/2004(H5N1)  | fatal   | DQ535724                                  | DQ535726 | DQ535725 | DQ535727 | DQ535728 | DQ535729 | DQ535730 | DQ535731 |
| A/Vietnam/CL100/2004(H5N1)  | fatal   | DQ497725                                  | DQ493074 | DQ492986 | DQ493162 | DQ493250 | DQ493337 | DQ493424 | DQ492898 |
| A/Vietnam/CL105/2005(H5N1)  | fatal   | DQ497726                                  | DQ493075 | DQ492987 | DQ493163 | DQ493251 | DQ493338 | DQ493425 | DQ492899 |
| A/Vietnam/CL115/2005(H5N1)  | surv.   | DQ497727                                  | DQ493076 | DQ492988 | DQ493164 | DQ493252 | DQ493339 | DQ493426 | DQ492900 |
| A/Vietnam/CL119/2005(H5N1)  | fatal   | DQ497728                                  | DQ493077 | DQ492989 | DQ493165 | DQ493253 | DQ493340 | DQ493427 | DQ492901 |
| A/Vietnam/CL2009/2005(H5N1) | fatal   | DQ497729                                  | DQ493078 | DQ492990 | DQ493166 | DQ493254 | DQ493341 | DQ493428 | DQ492902 |
